# Supplementary material for: A Novel Network Profiling Analysis Reveals System Changes in Epithelial-Mesenchymal Transition
Source: PLoS One. 2011 Jun 7;6(6):e20804. doi: 10.1371/journal.pone.0020804 (PMC3110206; doi:10.1371/journal.pone.0020804)
Supplement: Table S3 — List of coherent genes ( -value ) related to EMT calculated by extraction of expression module (EEM). (XLS) [file pone.0020804.s008.xls]

## Sheet: Supplementary table 3
Gene Symbol	Entrez Gene	Probe ID
ACTN4	81	200601_at
CDH1	999	201131_s_at
CDH2	1000	203440_at
COL6A1	1291	213428_s_at
COL6A2	1292	213290_at
CTGF	1490	209101_at
CTNND1	1500	208862_s_at
CTSH	1512	202295_s_at
DAB2	1601	201278_at
DCN	1634	201893_x_at
DDR2	4921	205168_at
DUSP1	1843	201044_x_at
EGR1	1958	201693_s_at
F3	2152	204363_at
FLNA	2316	213746_s_at
FOSB	2354	202768_at
GAS1	2619	204456_s_at
GRB7	2886	210761_s_at
HIF1A	3091	200989_at
HTRA1	5654	201185_at
ID1	3397	208937_s_at
IFITM3	10410	212203_x_at
IL11	3589	206924_at
INHBA	3624	210511_s_at
IRF6	3664	202597_at
ITGB5	3693	201124_at
JUP	3728	201015_s_at
LAMB1	3912	201505_at
MMP2	4313	201069_at
MYH9	4627	211926_s_at
NRP1	8829	212298_at
PCOLCE	5118	202465_at
PDGFRA	5156	215305_at
PDGFRB	5159	202273_at
PLK2	10769	201939_at
PMP22	5376	210139_s_at
PPIC	5480	204517_at
PROCR	10544	203650_at
RRAS	6237	212647_at
SAT1	6303	213988_s_at
SDC2	6383	212158_at
SERPINB5	5268	204855_at
SPARC	6678	212667_at
TACSTD1	4072	201839_s_at
TGM2	7052	201042_at
THBS1	7057	201109_s_at
TNC	3371	216005_at
TSC22D1	8848	215111_s_at
UPP1	7378	203234_at
VIM	7431	201426_s_at
